# Supplementary material
Source: publisher figshare collection journal article supplement (https://future-science-group.figshare.com/articles/dataset/_/20072972)
Supplement: Supplementary file 1 [file 1]

**Table S1.** Primers used for PCR amplification and sequencing of the genome of coxsackievirus A24 (CVA-24) and Enterovirus A71 (EV-A71)

| **Strain** | **Primer** | **Nucleotide**  **Position (nt)a** | **Primer sequence (5′-3′)b** | **OrientatioN** |
| --- | --- | --- | --- | --- |
| **CVA-24/P12** | 5NCS663 | 469-500 | GCGGAACCGACTACTTTGGGTGTCCGTGTTTC | Forward |
| 5NC642B | 625-642 | TGGATTGGCCAYCCRGTG | Reverse |
| TUN_P12_CVA24_new1BS | 797-814 | GTGGCAACAGGTGGTTCC | Forward |
| TUN_P12_04_S1B | 1042-1059 | CGCAGTGGTTGCCTACGG | Forward |
| HEVR436 | 1116-1140 | GGNTGGTRNTGGAANYTNCCNGATG | Reverse |
| HEVCS1315 | 2009-2027 | GAAYTAYTAYACNCAYTGG | Forward |
| TUN_P12_CVA24_1CR | 2247-2265 | CCTCGTGCACTATGCTAGC | Reverse |
| TUN_P12_CVA24_new1CR | 2414-2432 | CCCGACTTCAGTGTGAGGC | Reverse |
| TUN_P12_01_S1D | 2980-2997 | GGCACCACAACCAACGGC | Forward |
| TUN_P12_02_R2A | 3555-3573 | CCATCGCCAGGTGCAACTG | Reverse |
| TUN_P12_03_S2C | 4324-4343 | CACTATCCACCAATCATGCC | Forward |
| P2R1093 | 4413-4434 | CAGTTCAAGAGCAAACACCGTA | Reverse |
| TUN_P12_CVA24_3AS | 4983-5001 | GCTGTCCATTGATCTGTGG | Forward |
| EV71_R3CD_5195 | 6005-6023 | GGTGAGATCCAATGGATGA | Reverse |
| TUN_P12_CVA24_3DS | 6232-6249 | GGCAGTGGACCATTACGC | Forward |
| HEVC3NC | 7430-7458 | GTAGGGGTAAATTTTTCTTTAATTCGGAG | Reverse |
| **EV-A71/R6** | 5NC642B (reverse) | 627-644 | TGGATTGGCCAYCCRGTG | Reverse |
| 5NCS663 | 535-566 | GCGGAACCGACTACTTTGGGTGTCCGTGTTTC | Forward |
| HEVR436 | 1180-1204 | GGNTGGTRNTGGAANYTNCCNGATG | Reverse |
| EV71-SVP2-P1 | 1112-1129 | CGCGCCCAGATGTTTCGG | Forward |
| EV71_C1_564 =(C1S564) | 1308-1325 | AGGRGCACTCCTAGTYGC | Forward |
| EV71_C1_1160 =(C1S1160) | 1904-1923 | GYTTAATGGAGAGACTGCGC | Forward |
| HEVAS1495 | 2214-2237 | GGTNATNCCNTGGATAAGYAACAC | Forward |
| HEVAR2807 | 3464-3487 | CYACNGCNCARGGNTGYGACACGA | Reverse |
| 1D-6-S1 | 3207-3226 | RCACGTCAGGGCGTGGRTAC | Forward |
| HEVAR2C | 4410-4433 | CATGCAGTTCAAGAGCAARCACCG | Reverse |
| OMS203-S1 | 4160-4179 | TCATTGATTGGCTCAAGGAG | Forward |
| HEVAS2C | 4410-4433 | CATGCAGTTCAAGAGCAARCACCG | Forward |
| 3CD-5-R2 | 5659-5678 | CCAGAAACAATTAGYCCTGC | Reverse |
| CF341034-S2 | 4971-4991 | GGTGAGATACAGTTTGGACAC | Forward |
| HEVAS3CD | 5449-5474 | GACCARGGNCAYTTYACNATGYTRGG | Forward |
| HEVAR3CD | 6590-6609 | GGAGYAARYTACCRATYCTA | Reverse |
| EV71_S3CD_5385 | 6129-6145 | AAACACGCTCCATGAGC | Forward |
| HEVAS3D-6769 | 6649-6672 | GAYGCHAGYCTYAGYCCNGTNTGG | Forward |
